# Supplementary material for: MRI-derived g-ratio and lesion severity in newly diagnosed multiple sclerosis
Source: PubMed Central journal article supplement (PMC8643503; doi:10.1093/braincomms/fcab249), 2021-11-03
Supplement: fcab249_supplementary_data.pdf [file fcab249_supplementary_data.pdf]

## **Supplementary Information:**

### **MRI-derived g-ratio and lesion severity in newly diagnosed multiple sclerosis**

#### **Contents**

Supplementary Methods

Supplementary Figures 1-5

Supplementary Table 1-3

## Supplementary Methods

### MR Imaging Data Acquisition

MRI Acquisition Parameters are outlined in supplementary table 1.

### MR Preprocessing

Hyperintense white matter lesions (WML) on T2 FLAIR (Fluid Attenuated Inversion Recovery) were automatically segmented using a combination of FSL (5.0.1, <http://www.fmrib.ox.ac.uk/fsl>) and an in-house thresholding method (Figure 1C). Intracranial volumes (ICV) were segmented with FSL and cerebral normal-appearing white matter (NAWM) segmentation masks were obtained with FreeSurfer (6.0, <https://surfer.nmr.mgh.harvard.edu/>) from the 3D T1-weighted MPRAGE image. Along with the 3D T1-weighted MPRAGE, masks were registered to DW space with FSL FLIRT epi\_reg, binarised and NAWM masks were eroded by one voxel to reduce partial volume effects. Segmentations were manually checked and edited where necessary (Figure 2A). The cerebellum was not included due to technical inaccuracies.

MTsat ( $\delta_{app}$ ) and T1app parametric maps were calculated according to Helms et al<sup>1</sup>, with in-house code in MATLAB (R2018b, see <https://doi.org/10.7488/ds/2965>), and registered to the first volume (b0) of the diffusion data with the FSL FLIRT epi\_reg script. The magnetisation transfer ratio (MTR) was calculated as:

$$MTR = 100 \cdot \frac{(S_{PD} - S_{MT})}{S_{PD}}$$

The diffusion data were processed with FSL (6.0.1) to extract the brain from the skull, remove bulk motion and eddy-current induced distortions, and register all volumes to the first diffusion volume. The NODDI toolbox (v1.0, [mig.cs.ucl.ac.uk](http://mig.cs.ucl.ac.uk), MATLAB R2016b) was used to determine signal fractions from the diffusion MR-visible compartments.

### **Myelin Volume Fraction: Calculation of k from healthy control data**

The constant,  $k$ , was derived by assuming a g-ratio of 0.7 in the splenium of the corpus callosum from two healthy controls. Healthy controls were scanned twice, one week apart. Data processing followed the same steps as patient data (without WML masks). The splenium mask was derived with FreeSurfer (<https://surfer.nmr.mgh.harvard.edu/>). The calibration factor was calculated as:

$$k = \frac{1}{\delta_{app}} * (1 - (\frac{1}{(1 + ((\frac{1}{0.7^2}) - 1)(1 - v_{iso})v_{ic})}))$$

The resulting mean k value across both sessions and subjects was 13.921 (Subject 1: 12.1717 and 14.24 ; Subject 2: 15.237 and 13.488, at time-point 1 and 2, respectively).

### **G-ratio Flat Lesion Maps**

In order to assess the impact of lesion location on g-ratio, we created a 2D g-ratio distribution “flat” lesion maps for visual assessment. G-ratio parametric maps were masked with white matter lesion segmentations (FSLmaths), and imported into MATLAB (R2018b) with SPM12 functions. G-ratio values were averaged along the z-axis, creating a 2D array, which roughly approximates an individual’s cerebral lesion distribution in the superior-to-inferior axis. Although, anatomically, this distribution will vary to some degree depending on the subject’s position in the MR scanner, it allows quick visual assessment of any anterior-posterior bias in the distribution of g-ratio values. A colour-map was overlaid onto the 2D maps and the distribution of lesions and z-direction-averaged g-ratios across the four groups (high vs low lesion load/high vs. normal g-ratio) were compared visually.

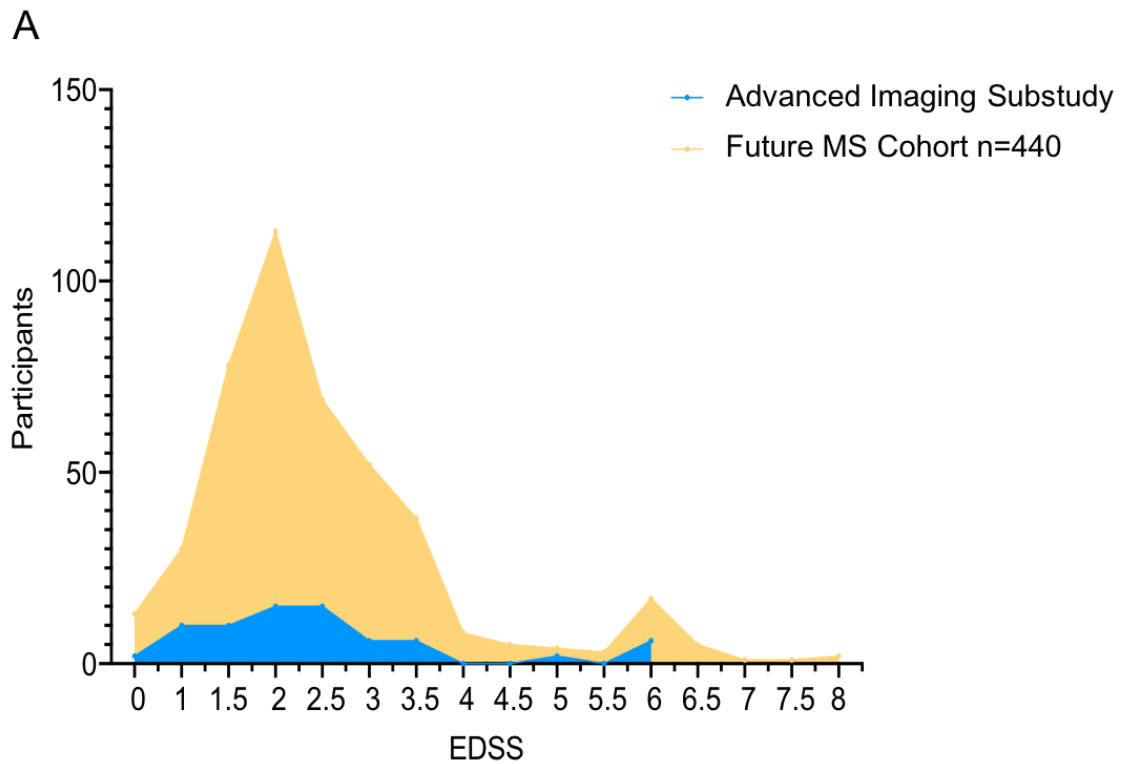

**B**

|                                                   | This cohort          | Future MS              |
|---------------------------------------------------|----------------------|------------------------|
| <i>Participants</i>                               | 73                   | 440                    |
| <i>Sex ratio, F:M</i>                             | 3.6                  | 2.82                   |
| <i>Age at diagnosis</i>                           | 33 (28-45)           | 37 (30-45)             |
| <i>Time from symptom onset to study inclusion</i> | 34 (12-69)           | 22 (10-62)             |
| <i>EDSS at baseline</i>                           | N=67/73<br>2 (1.5-3) | N=422/440<br>2 (1.5-3) |

**Supplementary Figure 1. Baseline disability and demographics of Advanced Imaging Substudy of the Future MS cohort**

EDSS distribution and demographic details of the Future-MS extended imaging substudy (n=73) compared to the Future MS (FMS) study (n=440, which include the 73 imaging substudy participants)

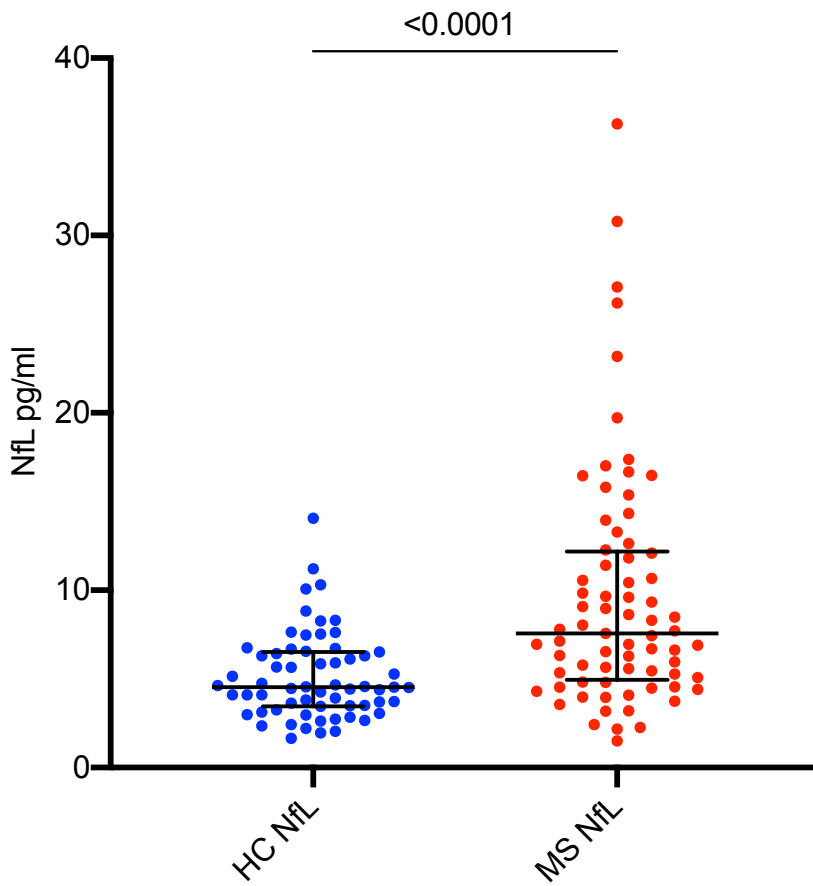

**Supplementary Figure 2. Plasma neurofilament levels are elevated in newly diagnosed MS patients compared to age and sex-matched healthy controls (HC) ( $p < 0.001$ , Mann-Whitney U-test)**

### High Lesion Load, Low g-ratio

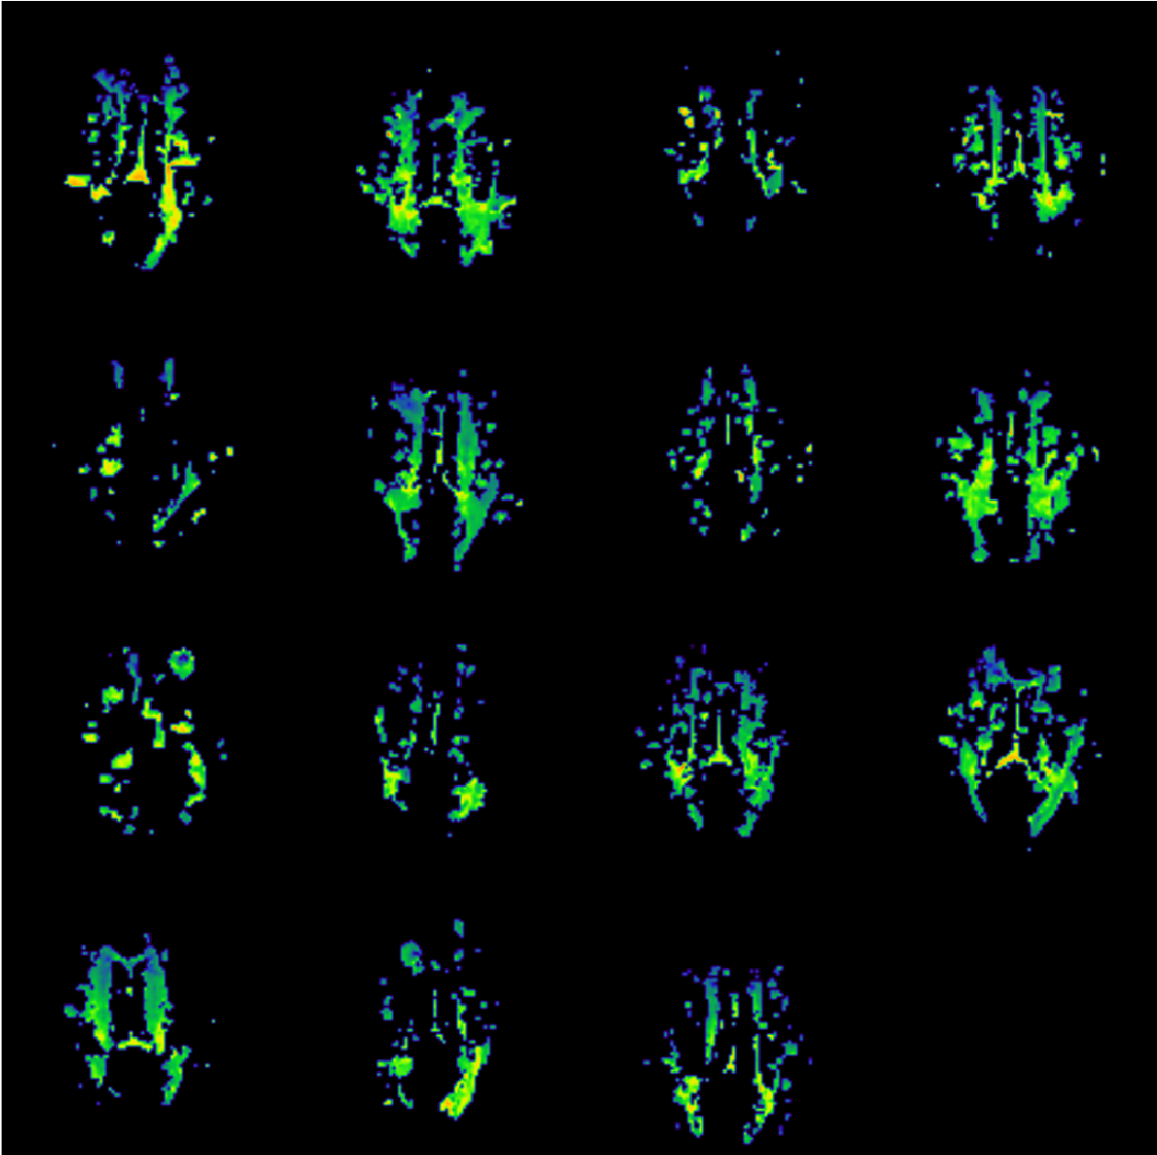

### Supplementary Figure 3. Flat map images of individual study participants with high lesion load (Corrected WML volume > 0.5%) and low g-ratio

In order to demonstrate 2D lesion distribution of patients with high lesion load and normal g-ratio in the axial plane, g-ratios within WML were averaged in the z-direction; red indicates an abnormally elevated g-ratio and blue is indicative of a normal g-ratio. There is no apparent difference in the distribution of lesion location in the axial plane between low and high g-ratio individuals (Supplementary Figure 4) with a high lesion load.

There was no significant difference in lesion volume between individuals with high and normal WML g-ratios for either the high lesion load group (0.998 vs 1.158,  $W=185$ ,  $p=0.72$ , Wilcoxon Rank Sum Test) or the low lesion load group (0.299 vs 0.180,  $W=196$ ,  $p=0.07$ ).

Within the high lesion load group, the anatomical location of lesions did not differ, when assessed visually on 2D “flattened” lesion distribution maps

### High Lesion Load, High g-ratio

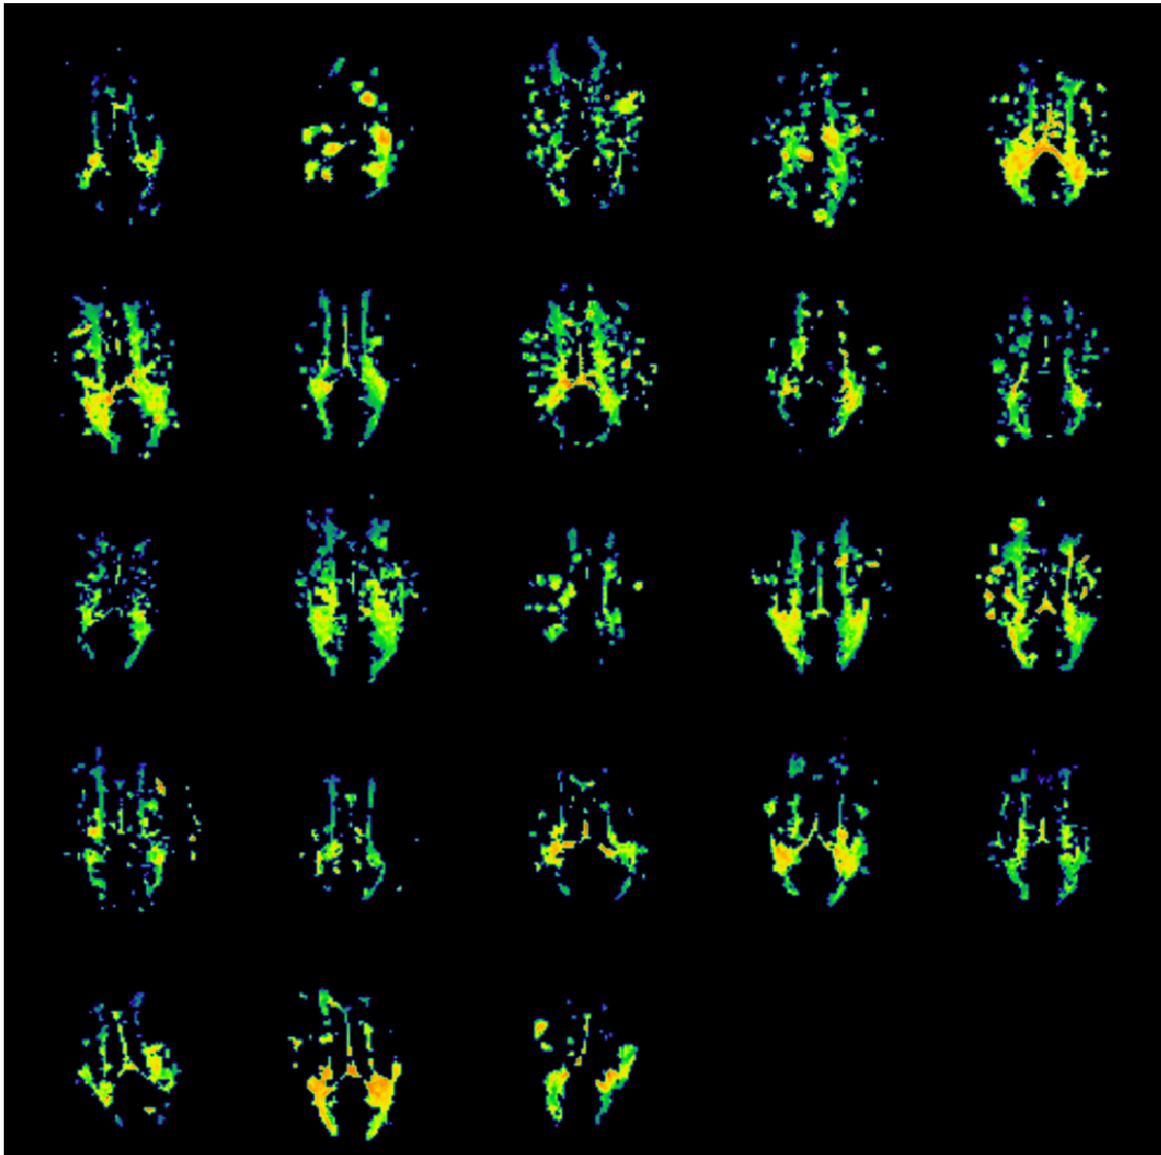

### Supplementary Figure 4. Flat map images of individual study participants with high lesion load (Corrected WML volume > 0.5%) and high g-ratio

As in Supplementary Figure 3 distribution of WML g-ratio in patients with high lesion load and abnormal g-ratio in the axial plane is illustrated by averaging WML g-ratio in the z-direction. Again, red indicates an abnormally elevated g-ratio and blue is indicative of a normal g-ratio. There is no apparent difference in the distribution of lesion location in the axial plane between low (Supplementary Figure 3) and high g-ratio individuals with a high lesion load.



**A: MTsat**

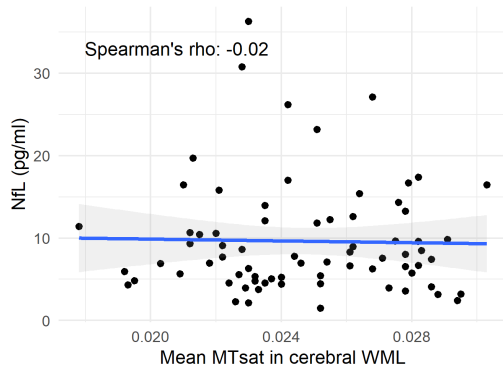

**B: MTR**

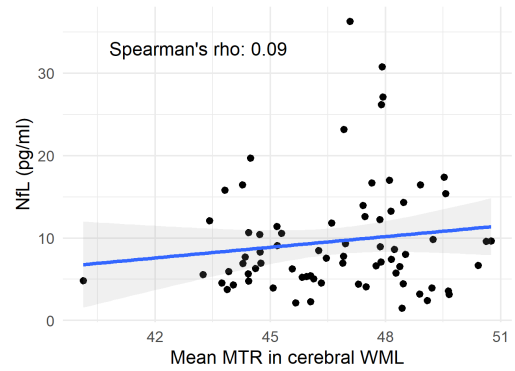

**C: T1app**

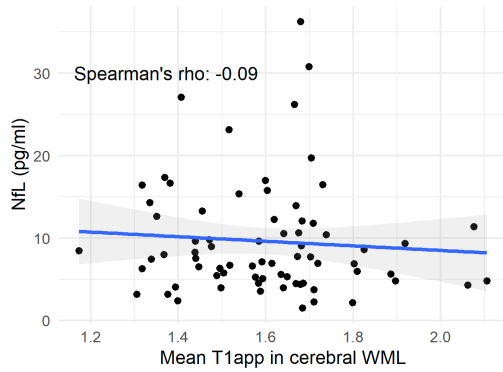

**D: g-ratio**

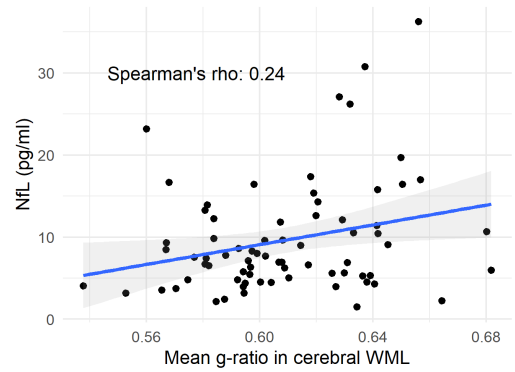

**Supplementary Figure 5. Correlation of MTsat, MTR, T1app and g-ratio with serum NFL**

In nonparametric tests of correlation (Spearman's rho) g-ratio is significantly associated with NFL ( $r_s=0.24$ ,  $p<0.05$ ). This was not observed in MTsat, MTR and T1app analyses

**Supplementary Table MRI Acquisition Parameters**

3.0-T MR system (Prisma; Siemens Healthcare, Erlangen, Germany) with a 32-channel head coil

| Sequence                                                                                                                                                                                                |                                        | FOV                                                | Acquisition Matrix | Slices | Voxel dimensions | TE (ms)                | TR (ms) | $\alpha$ (deg) | TI (ms) | In-plane x slice acceleration factor | Acquisition time (mm:ss) |
|---------------------------------------------------------------------------------------------------------------------------------------------------------------------------------------------------------|----------------------------------------|----------------------------------------------------|--------------------|--------|------------------|------------------------|---------|----------------|---------|--------------------------------------|--------------------------|
| sagittal 3D T1-weighted MPRAGE                                                                                                                                                                          |                                        | 256 x 256                                          | 256 x 256          | 176    | 1mm isotropic    | 2.26                   | 2500    | 7              | 1100    | 2 x 1                                | 5:59                     |
| axial 2D T2 FLAIR                                                                                                                                                                                       |                                        | 250 x 250                                          | 250 x 250          | 60     | 1 x 1 x 3mm      | 120                    | 9500    | 150            | 2400    | 2 x 1                                | 4:47                     |
| sagittal 3D FLASH spoiled gradient echo                                                                                                                                                                 | proton density (no saturation pulse)   | 224 (sagittal-inferior) x 241 (anterior-posterior) | 160 x 172          | 128    | 1.4 mm isotropic | 1.54/<br>4.55/<br>8.49 | 30      | 5              | -       | 2 x 1                                | 6:14                     |
|                                                                                                                                                                                                         | proton density (with saturation pulse) |                                                    |                    |        |                  |                        |         |                |         |                                      | 6:14                     |
|                                                                                                                                                                                                         | T1-weighted (no saturation pulse)      |                                                    |                    |        |                  |                        | 3:08    |                |         |                                      |                          |
| magnetisation transfer gaussian off-resonance saturation pulse ( $\alpha$ : 500°; duration: 9.984 ms; offset: 1.2kHz)                                                                                   |                                        |                                                    |                    |        |                  |                        |         |                |         |                                      |                          |
| axial multiband diffusion-weighted echo-planar imaging                                                                                                                                                  |                                        | 256 x 256                                          | 128 x 128          | 74     | 2.0 mm isotropic | 74                     | 4300    | -              | -       | 2 x 2                                | 11:12                    |
| acquired with 151 diffusion directions comprising interleaved b-values of 0 (14), 200 (3), 500 (6), 1000 (64), 2000 (64) s/mm <sup>2</sup> , in addition to 3 x b0 volumes with reversed phase encoding |                                        |                                                    |                    |        |                  |                        |         |                |         |                                      |                          |

*FOV: field of view; SI: sagittal-inferior; AP: anterior-posterior; TE: echo time; TR: repetition time; MPRAGE: Magnetisation Prepared Rapid Gradient Echo; FLASH: fast low-angle shot spoiled gradient echo*

**Supplementary Table 1. MRI Acquisition Parameters**

|                      | LOW LESION VOLUME |              | HIGH LESION VOLUME |              |
|----------------------|-------------------|--------------|--------------------|--------------|
|                      | LOW g-ratio       | HIGH g-ratio | LOW g-ratio        | HIGH g-ratio |
| <b>Baseline EDSS</b> | 2                 | 2.5          | 2                  | 2.5          |
| <b>1-year EDSS</b>   | 2                 | 3            | 3                  | 3            |

**Supplementary Table 2. Median baseline and 1-year EDSS scores for study individuals, according to lesion volume and g-ratio**

There was no correlation between g-ratio and baseline EDSS (Spearman's rho=0.08, p=0.51), and no correlation between NfL and EDSS (Spearman's rho=0.06, p=0.63)

| Fisher's Exact Test: Threshold: 0.4% |                         |              |                        |              |
|--------------------------------------|-------------------------|--------------|------------------------|--------------|
|                                      | High Lesion Load (n=43) |              | Low Lesion Load (n=30) |              |
|                                      | Normal g-ratio          | High g-ratio | Normal g-ratio         | High g-ratio |
| Normal NfL                           | 15                      | 15           | 17                     | 9            |
| High NfL                             | 2                       | 11           | 3                      | 1            |
| p-value                              | 0.045                   |              | 1                      |              |

| Fisher's Exact Test: Threshold: 0.5% |                         |              |                        |              |
|--------------------------------------|-------------------------|--------------|------------------------|--------------|
|                                      | High Lesion Load (n=38) |              | Low Lesion Load (n=35) |              |
|                                      | Normal g-ratio          | High g-ratio | Normal g-ratio         | High g-ratio |
| Normal NfL                           | 13                      | 12           | 19                     | 12           |
| High NfL                             | 2                       | 11           | 3                      | 1            |
| p-value                              | 0.039                   |              | 1                      |              |

| Fisher's Exact Test: Threshold: 0.6% |                         |              |                        |              |
|--------------------------------------|-------------------------|--------------|------------------------|--------------|
|                                      | High Lesion Load (n=33) |              | Low Lesion Load (n=40) |              |
|                                      | Normal g-ratio          | High g-ratio | Normal g-ratio         | High g-ratio |
| Normal NfL                           | 12                      | 10           | 20                     | 14           |
| High NfL                             | 1                       | 10           | 4                      | 2            |
| p-value                              | 0.022                   |              | 1                      |              |

**Supplementary Table 3. Sensitivity analysis for lesion volume threshold**

## Appendix - Members of the Future-MS Consortium

The FutureMS consortium includes clinicians, data processors, or other FutureMS team members that have contributed to acquisition of data, access to patients, or whom have been relied upon for their input.

| Location             | Affiliations                                                                                                                                                  |
|----------------------|---------------------------------------------------------------------------------------------------------------------------------------------------------------|
| <b>Edinburgh</b>     |                                                                                                                                                               |
| Siddharthan Chandran | Anne Rowling Clinic, Centre for Clinical Brain Sciences, Edinburgh Neuroscience, Euan MacDonald Centre for MND Research, University of Edinburgh, NHS Lothian |
| Peter Connick        | Anne Rowling Clinic, Centre for Clinical Brain Sciences, University of Edinburgh, NHS Lothian                                                                 |
| David Hunt           | Anne Rowling Clinic, Centre for Clinical Brain Sciences, Institute of Genetics and Cancer, University of Edinburgh, NHS Lothian,                              |
| Christine Batchelor  | Anne Rowling Clinic, Centre for Clinical Brain Sciences, University of Edinburgh                                                                              |
| Sara Hathorn         | Anne Rowling Clinic, Centre for Clinical Brain Sciences, University of Edinburgh                                                                              |
| Denise Cranley       | Anne Rowling Clinic, Centre for Clinical Brain Sciences, University of Edinburgh                                                                              |
| Mary Monaghan        | Anne Rowling Clinic, Centre for Clinical Brain Sciences, University of Edinburgh                                                                              |
| Shuna Colville       | Anne Rowling Clinic, Centre for Clinical Brain Sciences, University of Edinburgh                                                                              |
| Suzanne Quigley      | Anne Rowling Clinic, Centre for Clinical Brain Sciences, University of Edinburgh                                                                              |
| Kiran Jayprakash     | Anne Rowling Clinic, Centre for Clinical Brain Sciences, University of Edinburgh                                                                              |
| Elizabeth Elliot     | Anne Rowling Clinic, Centre for Clinical Brain Sciences, University of Edinburgh                                                                              |
| Patrick Kearns       | Anne Rowling Clinic, Centre for Clinical Brain Sciences, University of Edinburgh                                                                              |
| Michaela Kleynhans   | Anne Rowling Clinic, Centre for Clinical Brain Sciences, University of Edinburgh                                                                              |

|                   |                                                                                               |
|-------------------|-----------------------------------------------------------------------------------------------|
| Fraser Brown      | Anne Rowling Clinic, Centre for Clinical Brain Sciences, University of Edinburgh              |
| Stella Glasmacher | Anne Rowling Clinic, Centre for Clinical Brain Sciences, University of Edinburgh              |
| Lee Murphy        | Welcome Trust Genetics Core Laboratory, University of Edinburgh                               |
| Alan Maclean      | Welcome Trust Genetics Core Laboratory, University of Edinburgh                               |
| Katarzyna Hafezi  | Welcome Trust Genetics Core Laboratory, University of Edinburgh                               |
| Peter Foley       | Anne Rowling Clinic, Centre for Clinical Brain Sciences, University of Edinburgh, NHS Lothian |
| Don Mahad         | Anne Rowling Clinic, Centre for Clinical Brain Sciences, University of Edinburgh, NHS Lothian |
| Belinda Weller    | Anne Rowling Clinic , University of Edinburgh, NHS Lothian                                    |
| Nicola Macleod    | Anne Rowling Clinic , University of Edinburgh, NHS Lothian                                    |
| Emily Harrison    | Anne Rowling Clinic , University of Edinburgh, NHS Lothian                                    |
| Matt Justin       | Anne Rowling Clinic , University of Edinburgh, NHS Lothian                                    |
| Anna Williams     | Anne Rowling Clinic, Centre for Clinical Brain Sciences, University of Edinburgh, NHS Lothian |
| Katy Murray       | Anne Rowling Clinic, Centre for Clinical Brain Sciences, University of Edinburgh, NHS Lothian |
| Dawn Lyle         | Anne Rowling Clinic, Centre for Clinical Brain Sciences, University of Edinburgh, NHS Lothian |
| Judith Newton     | Anne Rowling Clinic, Centre for Clinical Brain Sciences, University of Edinburgh, NHS Lothian |
| Haane Haagenrud   | Anne Rowling Clinic, Centre for Clinical Brain Sciences, University of Edinburgh, NHS Lothian |
| Emily Beswick     | Anne Rowling Clinic, Centre for Clinical Brain Sciences, University of Edinburgh, NHS Lothian |
| Juan Larraz       | Anne Rowling Clinic, Centre for Clinical Brain Sciences, University of Edinburgh, NHS Lothian |
| Michael Wong      | Anne Rowling Clinic, Centre for Clinical Brain Sciences, University of Edinburgh, NHS Lothian |
| Charis Wong       | Anne Rowling Clinic, Centre for Clinical Brain Sciences, University of Edinburgh, NHS Lothian |

|                        |                                                                                                             |
|------------------------|-------------------------------------------------------------------------------------------------------------|
| Jessie Chang           | Anne Rowling Clinic, Centre for Clinical Brain Sciences, University of Edinburgh, NHS Lothian               |
| Maria Valdez Hernandez | Anne Rowling Clinic, Centre for Clinical Brain Sciences, University of Edinburgh, NHS Lothian               |
| Lucy Kessler           | Edinburgh Imaging, NHS Lothian                                                                              |
| Dr Rozanna Meijboom    | Centre for Clinical Brain Sciences, University of Edinburgh, Edinburgh Imaging                              |
| Professor Adam Waldman | Centre for Clinical Brain Sciences, University of Edinburgh, NHS Lothian, Edinburgh Imaging                 |
| Agniete Kampaite       | Centre for Clinical Brain Sciences, University of Edinburgh, NHS Lothian, Edinburgh Imaging                 |
| Julian Ng Kee Kwong    | University of Edinburgh                                                                                     |
| Daisy Mollison         | Centre for Clinical Brain Sciences, University of Edinburgh, NHS Lothian, Edinburgh Imaging                 |
| Stewart Wiseman        | University of Edinburgh, Demetian Research Institute, Centre for Clinical Brain Sciences, Edinburgh Imaging |
| Mark Bastin            | Centre for Clinical Brain Sciences, University of Edinburgh, NHS Lothian, Edinburgh Imaging                 |
| Elizabeth York         | Centre for Clinical Brain Sciences, University of Edinburgh, NHS Lothian, Edinburgh Imaging                 |
| Yingdi Chen            | Anne Rowling Clinic, Centre for Clinical Brain Sciences, University of Edinburgh, NHS Lothian               |
| Baljean Dhillon        | Centre for Clinical Brain Sciences Division of Health Sciences NHS Lothian                                  |
| Michael Thrippleton    | Centre for Clinical Brain Sciences, University of Edinburgh, NHS Lothian, Edinburgh Imaging                 |
| Aidan Hutchinson       | Anne Rowling Clinic ,Centre for Clinical Brain Sciences, University of Edinburgh                            |
| David Perry            | Centre for Clinical Brain Sciences, University of Edinburgh                                                 |
| Angus Grossart         | Anne Rowling Clinic ,Centre for Clinical Brain Sciences, University of Edinburgh                            |
| Amy Stenson            | Anne Rowling Clinic , University of Edinburgh, NHS Lothian                                                  |
| Christine Weaver       | Anne Rowling Clinic, Centre for Clinical Brain Sciences, University of Edinburgh, NHS Lothian               |

|                      |                                                                                               |
|----------------------|-----------------------------------------------------------------------------------------------|
| Rachel Dakin         | Anne Rowling Clinic, Centre for Clinical Brain Sciences, University of Edinburgh, NHS Lothian |
| <b>Glasgow</b>       |                                                                                               |
| Stewart Webb         | Institute of Neurological Sciences, Glasgow, NHS GGC                                          |
| Niall MacDougall     | Institute of Neurological Sciences, Glasgow, NHS GGC, University of Glasgow                   |
| Kathryn Love         | Institute of Neurological Sciences, Glasgow, NHS GGC                                          |
| Sarah Jane Martin    | Institute of Neurological Sciences, Glasgow, NHS GGC                                          |
| Lynn McMahon         | Precision Medicine Scotland Innovation Centre, University of Glasgow                          |
| <b>Dundee</b>        |                                                                                               |
| Jonathan O’Riordan   | University of Dundee, NHS Tayside                                                             |
| Lesley Macfarlane    | NHS Tayside                                                                                   |
| Gwen Kennedy         | NHS Tayside                                                                                   |
| Tracey Hopkins       | NHS Tayside                                                                                   |
| <b>Aberdeen</b>      |                                                                                               |
| Margaret Ann MacLeod | NHS Grampian                                                                                  |
| James MacDonald      | NHS Grampian                                                                                  |
| Beverly MacLennan    | NHS Grampian                                                                                  |
| <b>Inverness</b>     |                                                                                               |
| Javier Carod Artal   | NHS Highland                                                                                  |
| Fiona Barret         | NHS Highland                                                                                  |
| James Finlayson      | NHS Highland                                                                                  |
| Adam Scotson         | NHS Highland                                                                                  |
| Ian Megson           | NHS Highland                                                                                  |
| <b>UCSF</b>          |                                                                                               |
| Sergio Baranzini     | University of California San Francisco                                                        |
| Adil Harroud         | University of California San Francisco                                                        |
| Amit Akula           | University of California San Francisco                                                        |



## References

1. Helms G, Dathe H, Kallenberg K, Dechent P. High-resolution maps of magnetization transfer with inherent correction for RF inhomogeneity and T1 relaxation obtained from 3D FLASH MRI. *Magn Reson Med* 2008;60:1396-407.
